# Supplementary material for: Luminescence and energy transfer of Eu2+/Tb3+/Eu3+ in LiBaBO3 phosphors with tunable-color emission
Source: Royal Society of Chemistry journal article supplement (doi:10.1039/c5tc01577d), 2015-01-01
Supplement: c5tc01577d1.pdf [file c5tc01577d1.pdf]

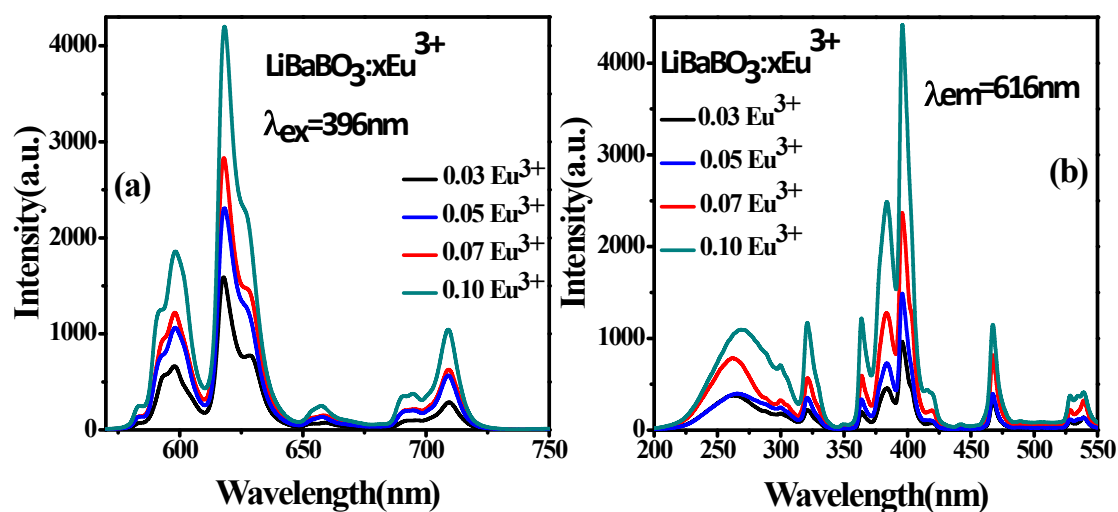

Figure S1 Emission (a) and excitation (b) spectra of  $\text{LiBaBO}_3:\text{xEu}^{3+}$  ( $x=0.03, 0.05, 0.07, 0.10$ ) (prepared in the air).

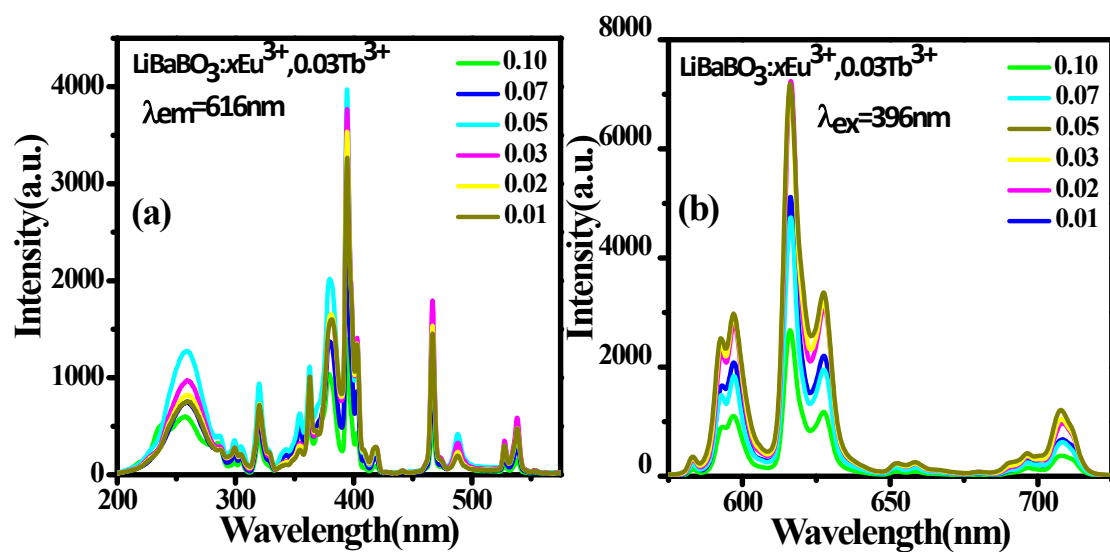

Figure S2 Excitation (a) and emission (b) spectra of  $\text{LiBaBO}_3:\text{xEu}^{3+}, 0.03\text{Tb}^{3+}$  ( $x=0.01, 0.02, 0.03, 0.05, 0.07, 0.10$ ) (prepared in the air).
